# Supplementary material for: Characterization of the Phytochemical Composition and Bioactivities of Anacyclus maroccanus Ball. and Anacyclus radiatus Loisel Aerial Parts: Preliminary Evidence for the Possible Development of Moroccan Plants
Source: MDPI journal article supplement (doi:10.3390/molecules27030692), 2022-01-21
Supplement: s1 [file s1]

Supplementary materials 1

# Characterization of the Phytochemical Composition and Bioactivities of *Anacyclus maroccanus* Ball. and *Anacyclus radiatus* Loisel Aerial Parts: Preliminary Evidence for the Possible Development of Moroccan Plants

Saida Sissi <sup>1,2</sup>, Silvia Di Giacomo <sup>2</sup>, Claudio Ferrante <sup>3</sup>, Paola Angelini <sup>4</sup>, Alberto Macone <sup>5</sup>, Anna Maria Giusti <sup>6</sup>, Chiara Toniolo <sup>7</sup>, Annabella Vitalone <sup>2</sup>, Aghraz Abdellah <sup>1</sup>, Mustapha Larhsini <sup>1</sup>, Luigi Menghini <sup>3</sup>, Mohammed Markouk <sup>1</sup>, Gabriela Mazzanti <sup>2,\*</sup> and Antonella Di Sotto <sup>2,\*</sup>

<sup>1</sup> Laboratory of Agri-Food, Biotechnology, and Valorization of Plant Resources, Phytochemistry and Pharmacology of Medicinal Plants Unit, Faculty of Sciences Semlalia, Cadi Ayyad University, P.O. Box 2390, Marrakech 40000, Morocco; saida.sissi@ced.uca.ma (S.S.); abdellah.aghraz@gmail.com (A.A.); larhsini@uca.ac.ma (M.L.); markouk@uca.ac.ma (M.M.)

<sup>2</sup> Department of Physiology and Pharmacology “V. Erspamer”, Sapienza University of Rome, P.le Aldo Moro 5, 00185 Rome, Italy; silvia.digiacomio@uniroma1.it (S.D.G.); annabella.vitalone@uniroma1.it (A.V.)

<sup>3</sup> Department of Pharmacy, Botanic Garden “Giardino dei Semplici”, University “Gabriele d’Annunzio” of Chieti-Pescara, Via dei Vestini 31, 66100 Chieti, Italy; claudio.ferrante@unich.it (C.F.); luigi.menghini@unich.it (L.M.)

<sup>4</sup> Department of Chemistry, Biology and Biotechnology, University of Perugia, 06122 Perugia, Italy; paola.angelini@unipg.it

<sup>5</sup> Department of Biochemical Sciences, A. Rossi Fanelli, Sapienza University of Rome, P.le A. Moro 5, 00185 Rome, Italy; alberto.macone@uniroma1.it

<sup>6</sup> Department of Experimental Medicine, Sapienza University of Rome, P.le Aldo Moro 5, 00185 Rome, Italy; annamaria.giusti@uniroma1.it

<sup>7</sup> Department of Environmental Biology, Sapienza University of Rome, P.le Aldo Moro 5, 00185 Rome, Italy; chiara.toniolo@uniroma1.it

\* Correspondence: gabriela.mazzanti@uniroma1.it (G.M.); antonella.disotto@uniroma1.it (A.D.S.)

**(a)**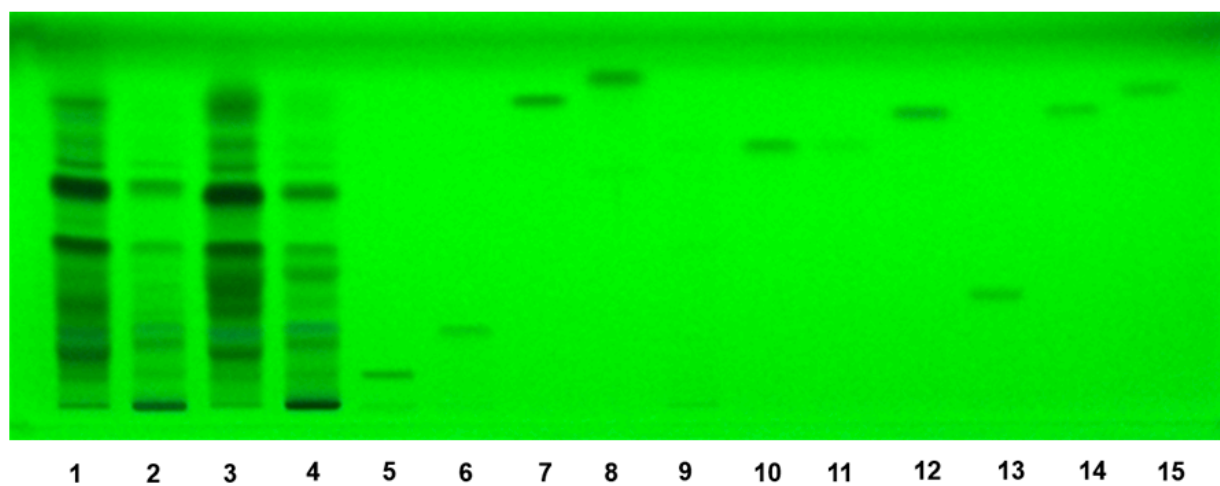**(b)**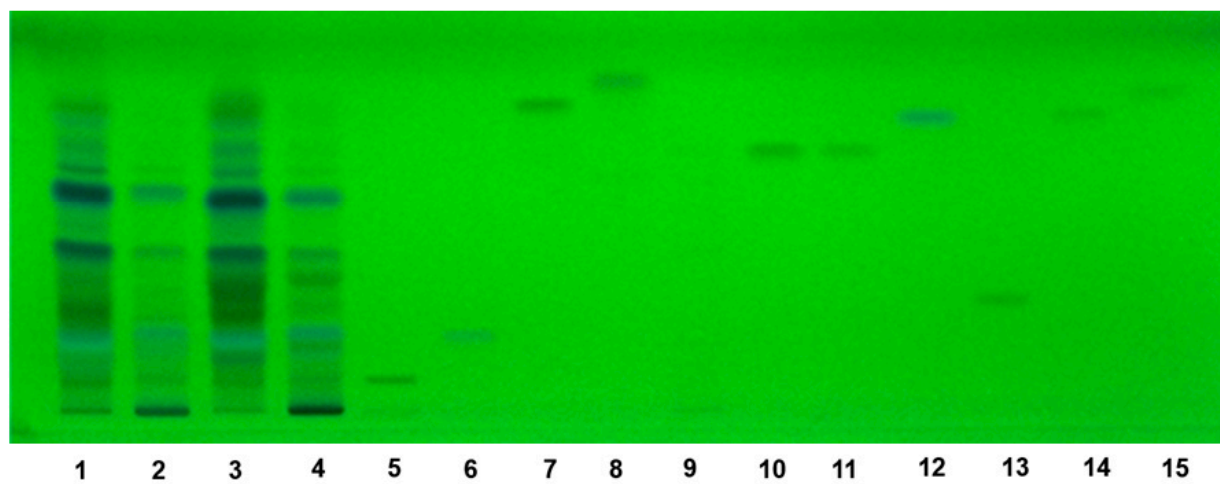**(c)**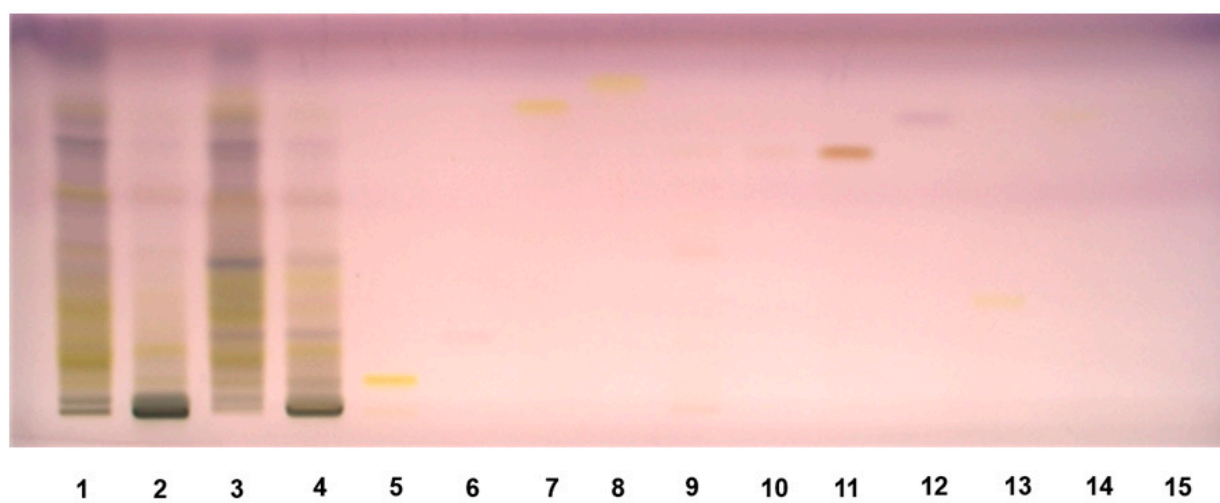

(d)

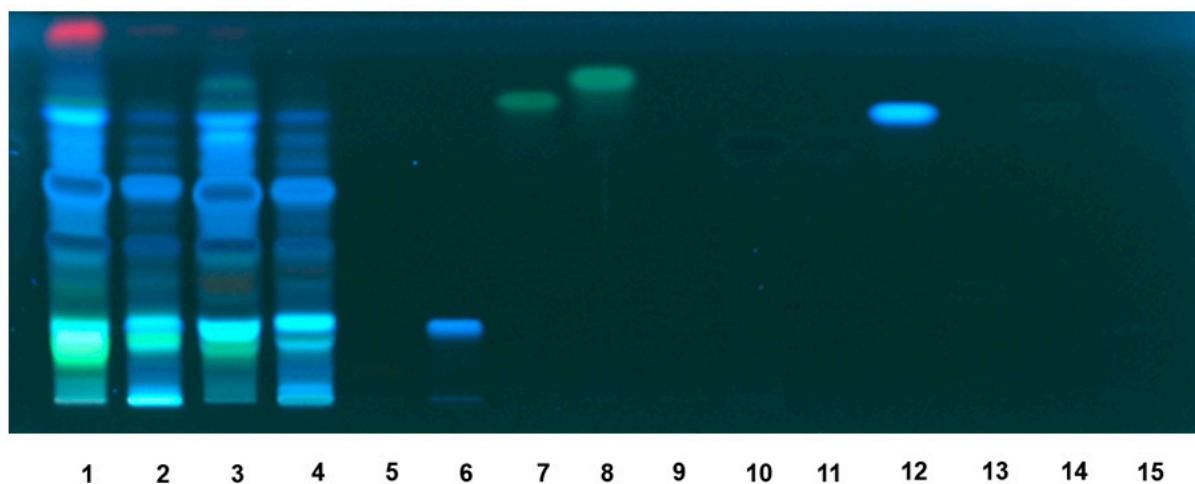

(e)

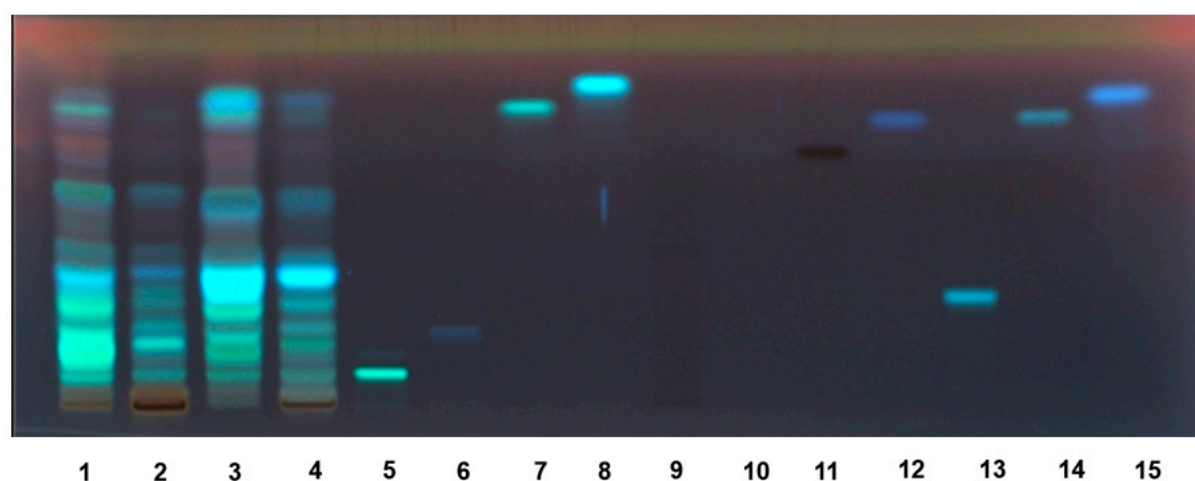

**Figure S1.** High-performance thin-layer chromatography (HPTLC) analysis of *Anacyclus maroccanus* Ball (AM) and *Anacyclus radiatus* Loisel (AR) extracts. HPTLC silica gel 60 glass-backed layers were developed using the solvent mixture ethyl acetate:dichloromethane:acetic acid:formic acid:water (100:25:10:10:11 v/v/v/v/v) and derivatized by Natural Product Reagent (NPR) and/or anisaldehyde. (a) Visualization at 254 nm. (b) Visualization at 254 nm after Natural Product Reagent (NPR) derivatization. (c) Visualization under white light after NPR and anisaldehyde derivatization (d) Visualization at 366 nm without derivatization. (e) Visualization at 366 nm after Natural Product Reagent (NPR) derivatization. The chromatograms correspond to 1. AM ethyl acetate extract; 2. AM methanolic extract; 3. AR ethyl acetate extract; 4. AR methanolic extract; 5. rutin; 6. chlorogenic acid; 7. quercetin; 8. kampferol; 9. epigallocatehin; 10. gallic acid; 11 catechin; 12. caffeic acid; 13. luteolin 7-O-glucoside; 14; luteolin; 15. apigenin.

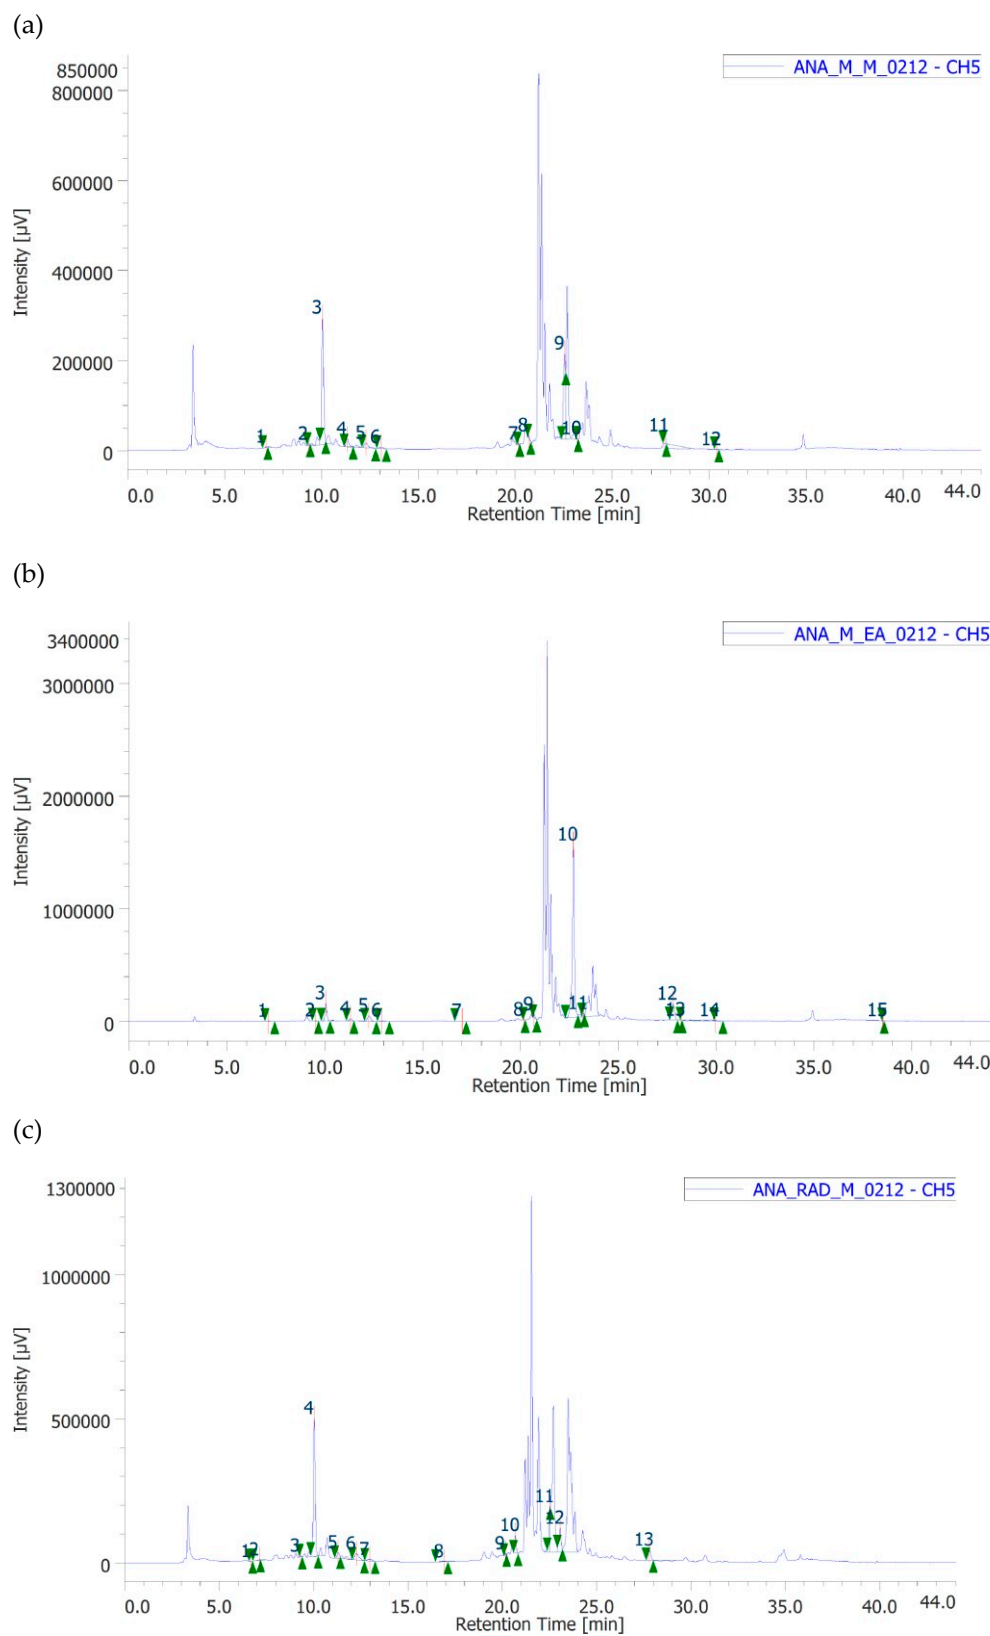

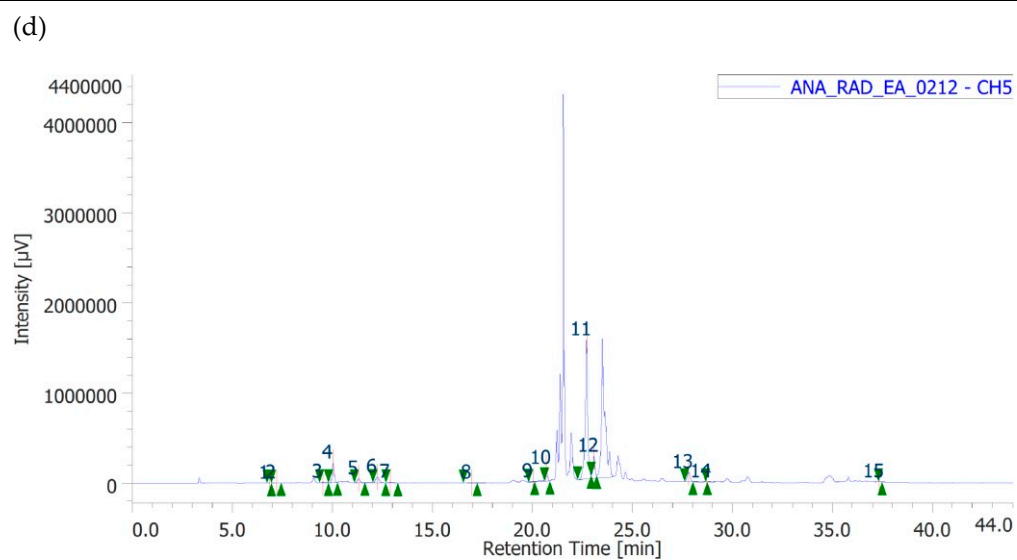

**Figure S2.** HPLC-DAD chromatograms of *Anacyclus maroccanus* Ball (AM) and *Anacyclus radiatus* Loisel (AR) extracts. (a) AM methanolic extract (b) AM ethyl acetate extract (c) AR methanolic extract (d) AR ethyl acetate extract.

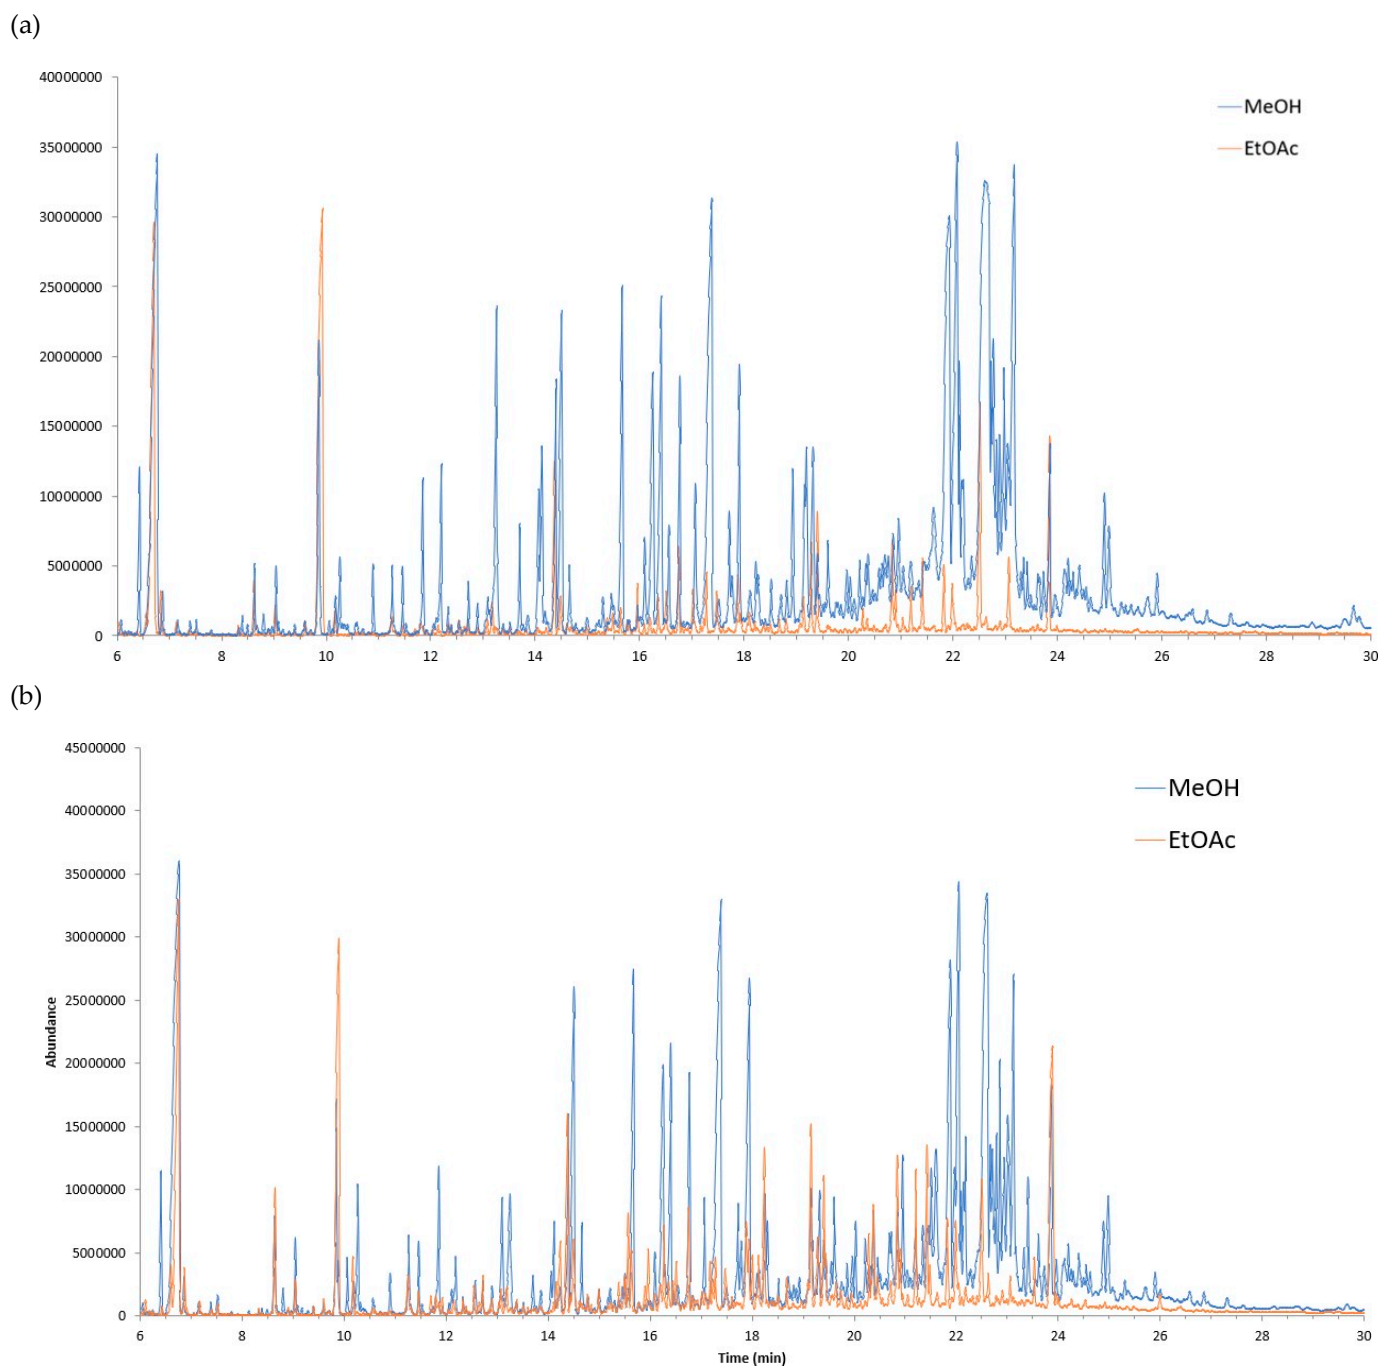

**Figure S3.** GC-MS chromatograms of *Anacyclus maroccanus* Ball (AM) and *Anacyclus radiatus* Loisel (AR) extracts. (a) AM methanolic and ethyl acetate extracts (b) AR methanolic and ethyl acetate extracts.



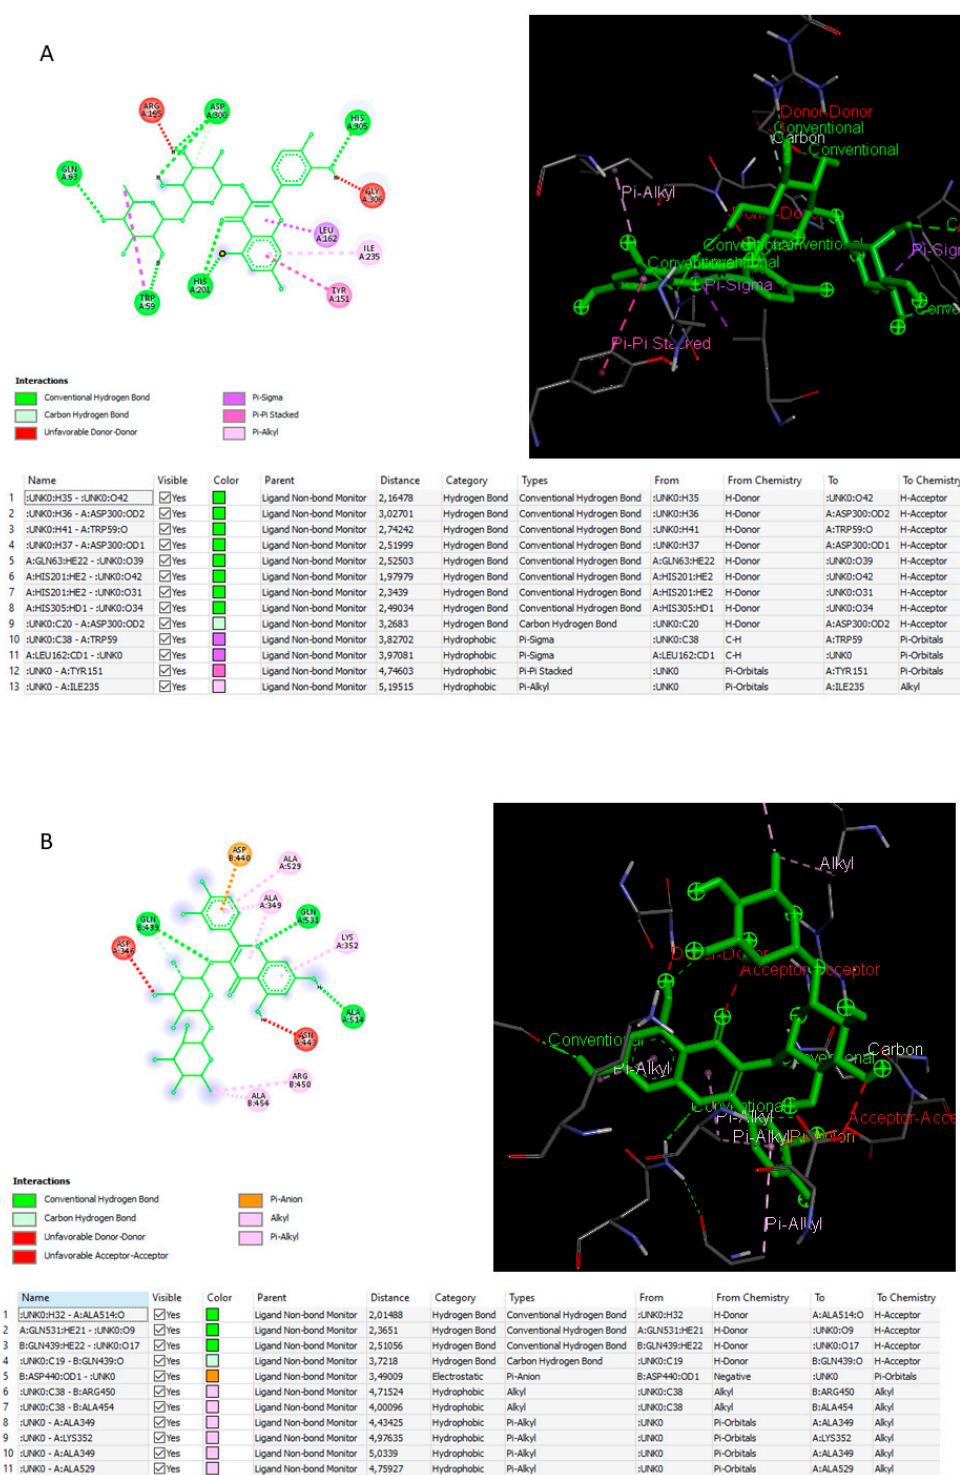

**Figure S4.** (A) Putative interactions between rutin and  $\alpha$ -amylase (PDB: 1B2Y). Free energy of binding ( $\Delta G$ ) and affinity (Ki) are  $-9.3$  kcal/mol and  $180$  nM, respectively. (B) Putative interactions between rutin and  $\alpha$ -glucosidase (PDB: 1B2Y). Free energy of binding ( $\Delta G$ ) and affinity (Ki) are  $-10.3$  kcal/mol and  $29$  nM, respectively.
